# Supplementary material for: Loss of AMP-activated protein kinase α2 subunit in mouse β-cells impairs glucose-stimulated insulin secretion and inhibits their sensitivity to hypoglycaemia
Source: PubMed Central journal article supplement — Biochem J. 2010 Jun 28;429(Pt 2):323–33. doi: 10.1042/BJ20100231 (PMC2895783; doi:10.1042/bj20100231), 2010-06-28
Supplement: bj4290323add.pdf [file bj4290323add.pdf]

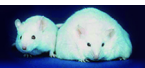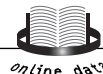

SUPPLEMENTARY ONLINE DATA

Loss of AMP-activated protein kinase  $\alpha 2$  subunit in mouse  $\beta$ -cells impairs glucose-stimulated insulin secretion and inhibits their sensitivity to hypoglycaemia

Craig BEALL<sup>\*1</sup>, Kaisa PIIPARI<sup>†1</sup>, Hind AL-QASSAB<sup>‡</sup>, Mark A. SMITH<sup>†\*</sup>, Nadeene PARKER<sup>‡</sup>, David CARLING<sup>§</sup>, Benoit VIOLLET<sup>||</sup>, Dominic J. WITHERS<sup>†2</sup> and Michael L. J. ASHFORD<sup>\*2</sup>

<sup>\*</sup>Biomedical Research Institute, Ninewells Hospital and Medical School, University of Dundee, Dundee DD1 9SY, Scotland, U.K., <sup>†</sup>Metabolic Signalling Group, MRC Clinical Sciences Centre, Imperial College London, London W12 0NN, U.K., <sup>‡</sup>Department of Cell and Developmental Biology, University College London, London WC1 6BT, U.K., <sup>§</sup>Cellular Stress Group, MRC Clinical Sciences Centre, Imperial College London, London W12 0NN, U.K., and <sup>||</sup>INSERM U567, CNRS, UMR 8104, Institut Cochin, Université Paris Descartes, Paris, France

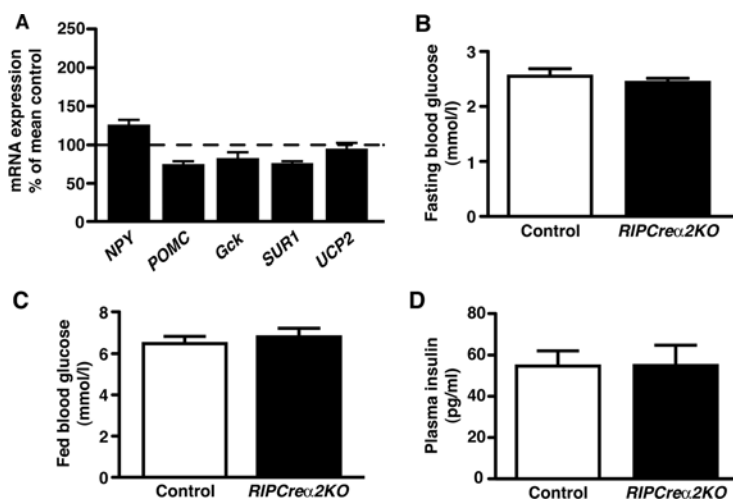

Figure S1 Hypothalamic mRNA expression profile and glucose homeostasis parameters in *RIPCre $\alpha 2$ KO* mice

(A) Expression of mRNA in the hypothalamus of *RIPCre $\alpha 2$ KO* mice, relative to control WT mice ( $n = 5$ ). Fasting (B) and fed (C) blood glucose levels in control ( $n = 8$ ) and *RIPCre $\alpha 2$ KO* 16- and 20-week-old male mice respectively ( $n = 8$ ). (D) Fasted plasma insulin levels in control ( $n = 9$ ) and *RIPCre $\alpha 2$ KO* 10-week-old male mice ( $n = 7$ ).

,

<sup>1</sup> These authors contributed equally to the present study

<sup>2</sup> Correspondence may be addressed to either of these authors (email m.l.j.ashford@dundee.ac.uk or d.withers@imperial.ac.uk).

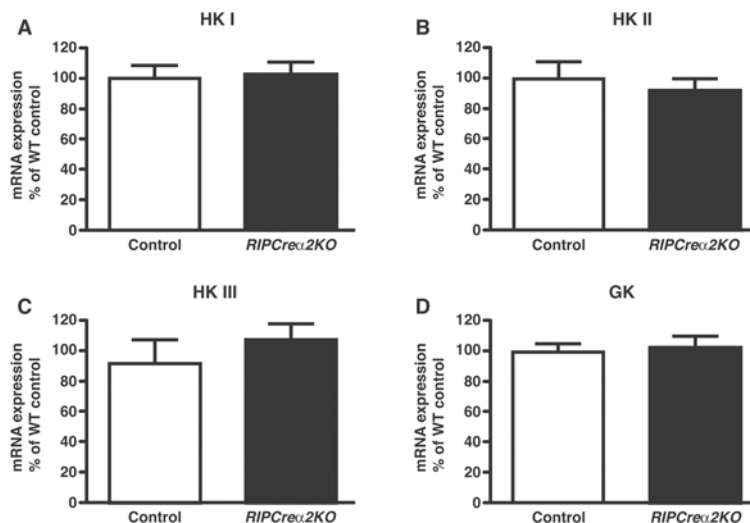

**Figure S2** Expression of mRNA in islets of *RIPCre;2KO* mice, relative to control (*RIPCre*) islets for (A) HK I, (B) HK II, (C) HK III, and (D) GK

Values are means  $\pm$  S.E.M. for  $n = 7-9$  determinations for each. The probes used were: Hexokinase I, Mm01145241\_m1; Hexokinase II, Mm00443395\_m1; and Hexokinase III, Mm01341937\_m1.

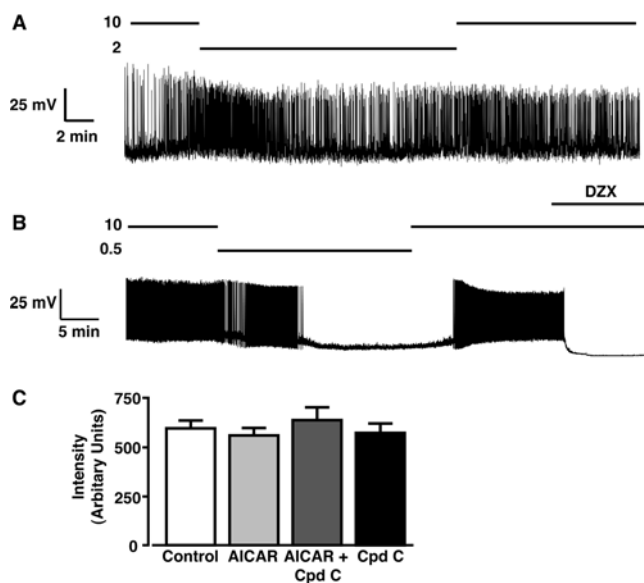

**Figure S3** CRI-G1  $\beta$ -cells exhibit glucose-sensing behaviour, and AMPK manipulation does not influence glucose uptake

Representative perforated patch recordings from CRI-G1  $\beta$ -cells, showing (A) the lack of electrical response to reduction of glucose from 10 mmol/l to 2 mmol/l and (B) the hyperpolarization and inhibition of firing on reduction of glucose from 10 mmol/l to 0.1 mmol/l. Note that the application of 250  $\mu$ mol/l diazoxide (DZX) hyperpolarizes the  $\beta$ -cell in the presence of 10 mmol/l glucose. (C) Glucose uptake, as measured by 2-NBDG uptake, in CRI-G1  $\beta$ -cells is unaltered by treatment of cells (1 h) with 1 mmol/l AICAR  $\pm$  40  $\mu$ mol/l compound C (CpdC) ( $n = 44$ , from six separate experiments).

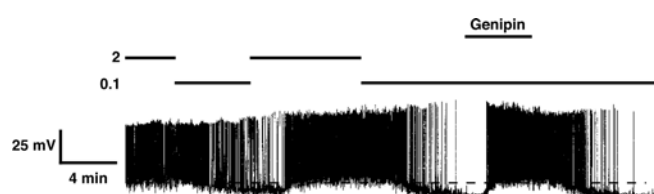

**Figure S4** Representative perforated patch recording from a POMC arcuate nucleus neuron

Reducing glucose from 2 mM to 0.1 mM reversibly hyperpolarizes and reduces firing frequency, but this effect is reversibly occluded by the presence of 20  $\mu$ M genipin. The broken line in the trace represents 0 mV.
